# Supplementary material for: Synthesis and characterization of Ag2ZnTiS4 nanostructures prepared by a hot-injection method towards low-cost electrocatalytic oxygen evolution
Source: Royal Society of Chemistry journal article supplement (doi:10.1039/d3nj03483f), 2023-01-01
Supplement: d3nj03483f1.pdf [file d3nj03483f1.pdf]

# Synthesis and characterization of $\text{Ag}_2\text{ZnTiS}_4$ nanostructures prepared by hot-injection method towards low-cost electrocatalytic oxygen evolution

Sidra Aslam<sup>a</sup>, Muhammad Awais<sup>a</sup>, Nadia Servat<sup>a</sup> and Muhammad Safdar<sup>a\*</sup>

<sup>a</sup> Institute of Chemistry, Khwaja Fareed UEIT, Rahim Yar Khan, Pakistan

\*Corresponding author

E-mail address: msafdarsami@yahoo.com (Muhammad Safdar)

## 1.1 Preparation of *Allium sativa* extract

### Sample collection and identification of Garlic bulb

Fresh bulbs of Garlic, *Allium sativa* (Family Amaryllidaceae) were purchased from the main market in Rahim Yar Khan city, Pakistan. Identification and authentication of the Garlic was done in the Chemistry laboratory of Khwaja Fareed UEIT.

### Preparation of extracts

The collected bulbs were washed with distilled water, air-dried for one hour and grounded into a fine powder using a sterile pestle and mortar under laboratory conditions. This paste was mixed with 500ml of ethanol in a beaker and soaked for 3 days with intermittent shaking. The mixtures were filtered using fine cloth and saved for the preparation of targeted material.

## 1.2 Synthesis of $\text{Ag}_2\text{ZnTiS}_4$ nanostructures

The change of color of the solution is presented in Figure S1 when respective salts were added to the *Allium sativa* extract and mixture stirred for one hour. After mixing both solutions the color of the solution is represented in Figure S2.

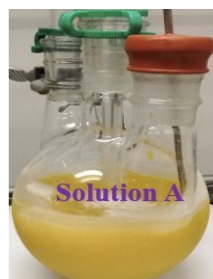

**Sodium sulfide,  
thiourea & garlic  
extract**

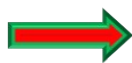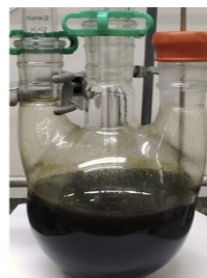

**Color after  
Stirring for 1 hr at  
50°C**

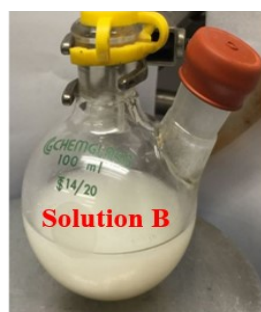

**zinc acetate, silver  
nitrate, titanium  
butoxide & & garlic  
extract**

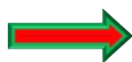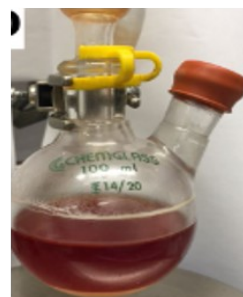

**Color after  
Stirring for 1 hr at  
50°C**

Figure S1: Change in color of solutions A and B after stirring for one hour at 50°C

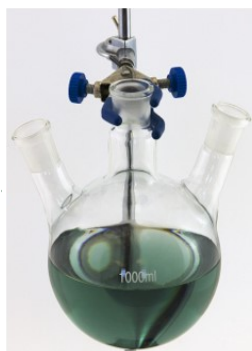

**Color of solution after  
mixing solution A and  
solution B at 100°C**

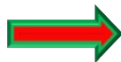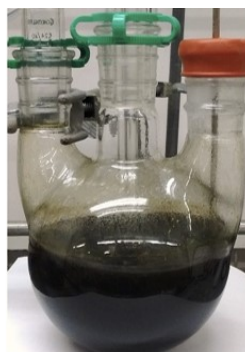

**Color of solution after  
two hours stirring at  
160°C**

Figure S2: Change in color of solutions after mixing solution A and solution B with stirring for two hours at 160°C
